# Supplementary material for: BRCA1 Interacting Protein COBRA1 Facilitates Adaptation to Castrate-Resistant Growth Conditions
Source: MDPI journal article supplement (doi:10.3390/ijms19072104), 2018-07-20
Supplement: s1 [file s1]

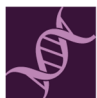

## Supplementary

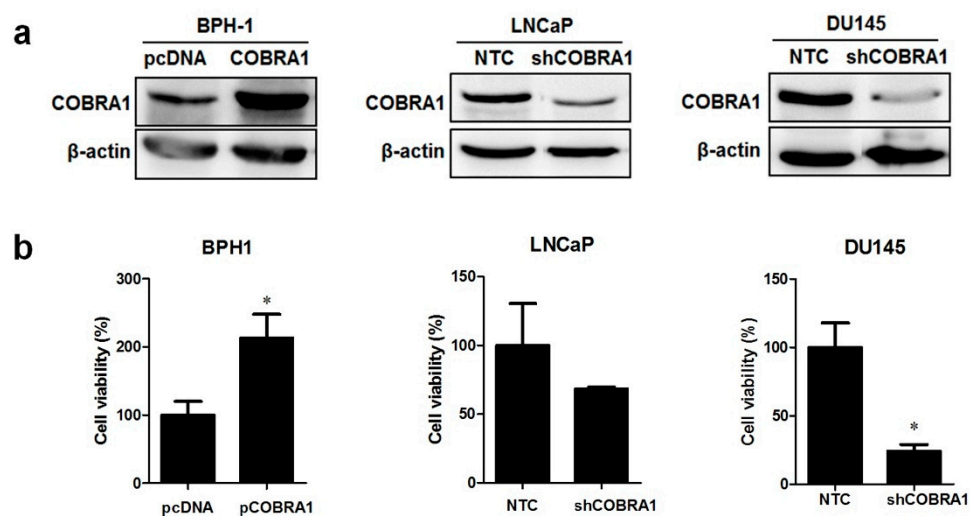

**Figure S1.** (a) Validation of COBRA1 overexpression or knockdown efficiency; (b) Cell viability was assessed by trypan blue staining. Data shown is a representative of three independent experiments. Error bars indicate  $\pm$  S.D. ( $n = 3$ ).
